# Supplementary material for: Identification of a high-affinity network of secretagogin-binding proteins involved in vesiclesecretion
Source: Royal Society of Chemistry journal article supplement (doi:10.1039/c0mb00349b), 2011-01-07
Supplement: c0mb00349b.pdf [file c0mb00349b.pdf]

**Identification of a high-affinity network of secretagogin-binding proteins involved in vesicle secretion - Supplementary information**

Mikael C. Bauer<sup>1\*</sup>, David J. O'Connell<sup>2\*</sup>, Magdalena Maj<sup>3</sup>, Ludwig Wagner<sup>3</sup>, Dolores J. Cahill<sup>2</sup>, Sara Linse<sup>1†</sup>

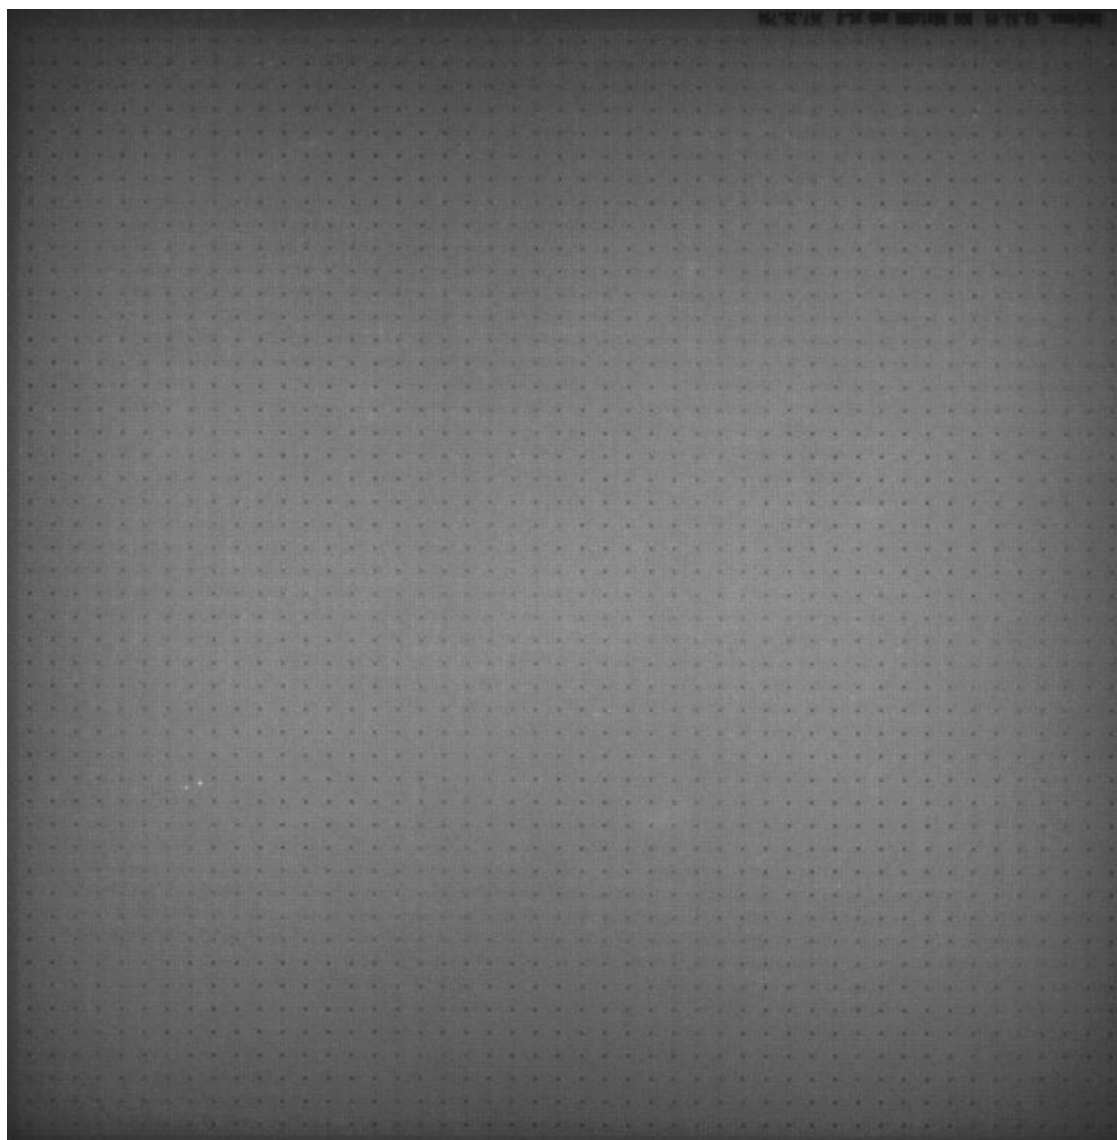

**Fig. S1** The hEx1 macroarray imaged at 480 nm after overnight incubation with 1  $\mu$ M Alexafluor488 labeled secretagogin in TBS with 1 mM  $\text{Ca}^{2+}$  and then washed six times in TBS-T with 1 mM  $\text{Ca}^{2+}$ .

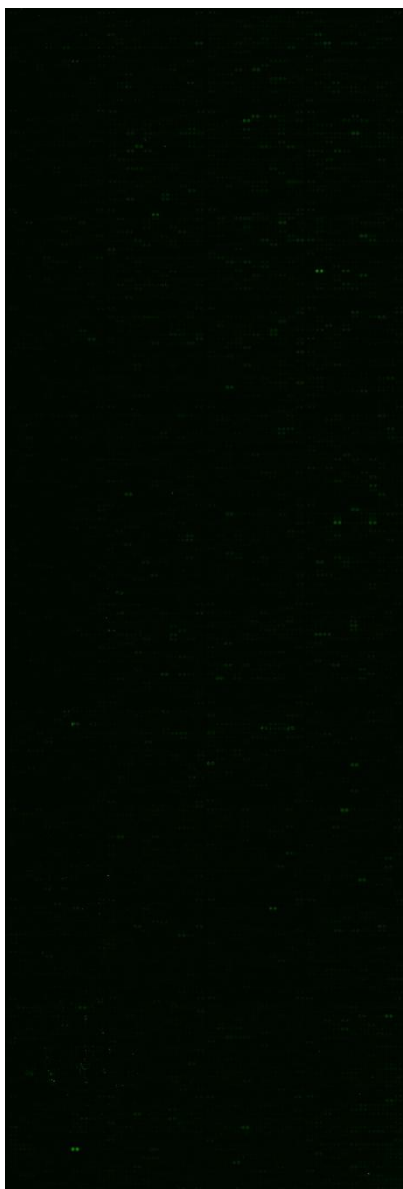

**Fig S2.** The ProtoArray imaged at 532 nm after 90 min incubation with 1  $\mu$ M Alexafluor546 labeled secretagoin in TBS with 1 mM  $\text{Ca}^{2+}$  and then washed five times in TBS with 1 mM  $\text{Ca}^{2+}$ .

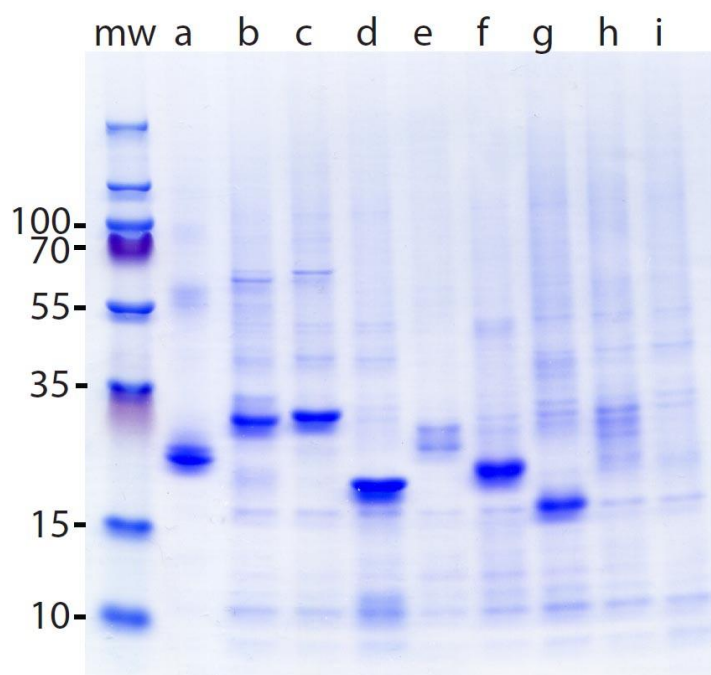

**Fig S3.** SDS-PAGE gel of the protein solutions used in SPR validation experiments. (a) DDAH-2, (b) myeloid leukaemia factor 2, (c) kif5b (d) ARFGAP2, (e) ATP synthase, (f) doc2-alpha, (g) SNAP-23, (h) rootletin, (i) beta tubulin.

|                   | N-term         | EF-hand                                | Linker                 |
|-------------------|----------------|----------------------------------------|------------------------|
| HumEF1            | MDSREPTLGRLDAA | <u>GFWQVWQRFDADEKGYIEEKELDAFFLHML</u>  | MKLGTTDDTVMKANLHK      |
| DanEF1            | MDSAFANLDAA    | <u>GFLQIWQHFDADDNGYIEGKELDDFFRHML</u>  | KKLQPKDKITDERVQQ       |
| HumEF2            |                | <u>VKQQFMTTQDASKDGRIRMKELAGMFLSED</u>  | ENFLLFRRENPM L D S S V |
| DanEF2            |                | <u>IKKSFMSAYDATFDGRLQIEELANMILPQE</u>  | ENFLLIFRREAP-LDNSV     |
| HumEF3            |                | <u>EFMQIWRKYDADSSGFISAAELRNFLRDLF</u>  | LHHKKAISEAKLEE         |
| DanEF3            |                | <u>EFMKIWRKYDADSSGYISAAELKNFLKDLF</u>  | LQHKKKIPPNKLDE         |
| HumEF4            |                | <u>YTGTMMKIFDRNKDGRDLNLDLARILALQE</u>  | NFLLQFKMDACSTEERK      |
| DanEF4            |                | <u>YTDAMMKIFDKNKDGRDLNLDLARILALQE</u>  | NFLLQFKMDASSQVERK      |
| HumEF5            |                | <u>DFEKIFAYYDVSKTGALEGPEVDGFVKDMM</u>  | ELVQPSISGVDLDK         |
| DanEF5            |                | <u>DFEKIFAHYDVSR TGALEGPEVDGFVKDMM</u> | ELVRPSISGGDLDK         |
| HumEF6            |                | <u>FREILLRHCDVNKDGKIQKSELALCLGLKI</u>  | NP                     |
| DanEF6            |                | <u>FRECLLTHCDMKNKDGKIQKSELALCLGLKH</u> | KP                     |
| EF-hand Consensus |                | EJ**JJ**JX*Y*ZG*JX**ZJ**JJ**J*         |                        |

**Figure S4.** Amino acid sequences of human (Hum) and zebra fish (Dan) secretagogin with identities in yellow. The EF-hand loops are underlined. The EF-hand consensus sequence is shown at the bottom with the calcium coordinating positions labeled X, Y, Z, -X and -Z, J=hydrophobic residue, E = glutamate and G = glycine.

**Table S1.** Proteins names, uniprot IDs and sizes of the clones for the putative targets found in the screen of the hEx1 library. \*This clone has a very high homology to the proteins rootletin and rootletin-like 1, the sequence expressed by the clone shows a identity >90% with the given region of rootletin

| <b>Name</b>                                                   | <b>UniProt ID</b> | <b>Size of clone</b> |
|---------------------------------------------------------------|-------------------|----------------------|
| <u>Validated</u>                                              |                   |                      |
| N(G),N(G)-dimethylarginine dimethylaminohydrolase 2 (DDAH-2)  | O95865            | 76-285               |
| synaptosomal-associated protein 23 (SNAP-23)                  | O00161            | 79-211               |
| myeloid leukemia factor 2                                     | Q15773            | 43-248               |
| ADP-ribosylation factor GTPase-activating protein 2 (ARFGAP2) | Q8N6H7            | 362-521              |
| kinesin heavy chain (kif5b)                                   | P33176            | 755-963              |
| double C2-like domain-containing protein alpha (DOC2alpha)    | Q14183            |                      |
| ATP synthase O subunit                                        | P48047            |                      |
| rootletin                                                     | Q5TZA2            | 483-653*             |
| tubulin, beta                                                 | P07437            | 299-430              |
| <u>Non-Validated</u>                                          |                   |                      |
| hemoglobin alpha subunit                                      | P69905            | 1-142                |
| ribosomal protein S2                                          | P15880            | 1-293                |
| proteasome subunit beta type 5                                | P28074            | 25-160               |

**Table S2.** Protein name, Gene ID and signal intensity of top ranking target from ProtoArray screen. Proteins in italic was also found in a parallel screen for calmodulin targets.

|                                     |             |       |
|-------------------------------------|-------------|-------|
| <i>Piccolo</i>                      | BC001304.1  | 614.5 |
| SNAP23                              | NM_003825.2 | 556   |
| kinesin light chain 2               | NM_022822.1 | 299.5 |
| <i>cortactin</i>                    | NM_138565.1 | 274.5 |
| chromosome 11 open reading frame 52 | NM_080659.1 | 228   |
| sciellin                            | BC047536.1  | 217.5 |
| chromosome 19 open reading frame 43 | NM_024038.2 | 217   |

**Table S3.** A summary of the validated and putative secretagogin targets grouped according to known functions related to vesicles. Proteins in brackets are non-validated putative targets.

*Vesicular fusion*

|                                                                                  |                                                                                                                                 |
|----------------------------------------------------------------------------------|---------------------------------------------------------------------------------------------------------------------------------|
| SNAP-23                                                                          | Part of SNARE-complexes in non-neuronal cells which control fusion of vesicles with membranes.                                  |
| ADP-ribosylation factor<br>GTPase-activating protein 2,<br>ARFGAP2<br>(ARFGAP 3) | Essential proteins for vesicle transport from ER to Golgi.                                                                      |
| double C2-like domain-<br>containing protein alpha,<br>DOC2alpha<br>(cortactin)  | Regulates Ca <sup>2+</sup> -dependent lysosome exocytosis.<br><br>Constituent of clathrin-coated pits, involved in endocytosis. |

*Vesicular transport*

|                                                                                                |                                                                                                                  |
|------------------------------------------------------------------------------------------------|------------------------------------------------------------------------------------------------------------------|
| kinesin heavy chain 1, KIF5B<br>(kinesin light chain 2, KLC2)<br>(kinesin light chain 4, KLC4) | Parts of the kinesin assembly. Moves along microtubuli and bind vesicles. Binds SNAP proteins.                   |
| β-tubulin                                                                                      | Together with α-tubulin the constituent of microtubulin filaments used for transport of vesicles and organelles. |

*Vesicular scaffolds*

|                        |                                                                                                                                                                                                            |
|------------------------|------------------------------------------------------------------------------------------------------------------------------------------------------------------------------------------------------------|
| rootletin<br>(piccolo) | Monomer of the rootlet a large structural unit in rod-cells. Binds vesicles and interacts with kinesins.<br><br>Acts as a scaffold for vesicles and for protein assemblies in the presynaptic active zone. |
|------------------------|------------------------------------------------------------------------------------------------------------------------------------------------------------------------------------------------------------|





## Supplementary discussion

Four of the top seven putative targets from the ProtoArray screen are involved in vesicle trafficking thus have a functional link to the validated ones from the hEX1 array. Piccolo is a huge protein, over 5000 amino acids, which is found in the presynaptic active zone and is thought to act as a scaffold for vesicles and protein assemblies (2, 3). Kinesin light chain 2 is part of the kinesin assembly that transports vesicles (1) and cortactin is part of the clathrin-coated pits, where endocytosis is initiated (4). SNAP-23 is among the validated proteins found in the human protein (hEx1) screen. Among the proteins with lower intensities in the ProtoArray screen is ARFGAP3, a functional homologue of the validated protein ARFGAP2. A brief summary of both validated and non-validated target proteins involved in vesicle trafficking grouped after functions is found in Table S3.

## References

1. Morton, AM., Cunningham, AL., and Diefenbach, RJ. Kinesin-1 plays a role in transport of SNAP-25 to the plasma membrane, *Biochem. Biophys. Res. Commun.* 2010, 391, 388-393.
2. Wang, X., Kibschull, M., Laue, M.M., Lichte, B., Perasch-Parwwz, E., and Kilimann, M.W. Aczonin, a 550-kD putative scaffolding protein of presynaptic active zones, shares homology regions with rim and bassoon and binds proffilin, *J. Cell Biol.* 1999, 147, 151-162
3. Mukherjee, K., Yang, X., Greber, S.H., Kwon, H.-K., Ho, A., Castillo, P.E., Liu, X., and Südhof T.C. Piccolo and bassoon maintain synaptic vesicle clustering without directly participating in vesicle exocytosis, *Proc. Natl. Acad. Sci. U.S.A.* 2010, 107, 6504-6509.
4. Cao, H., Orth, J.D., Chen, J., Weller, S.G., Heuser, J.E. and McNiven, M.A. Cortactin is a component of clathrin-coated pits and participates in receptor-mediated endocytosis. *Mol. Cell. Biol.* 2003, 23, 2162-2170.
